# Supplementary material for: L-3-n-butylphthalide attenuates inflammation response and brain edema in rat intracerebral hemorrhage model
Source: publisher site journal article supplement (doi:10.18632/aging.103342), 2020-06-21
Supplement: Supplementary file [file aging-v12i12-103342-supplementary-material-SD1.pdf]

## SUPPLEMENTARY FIGURE

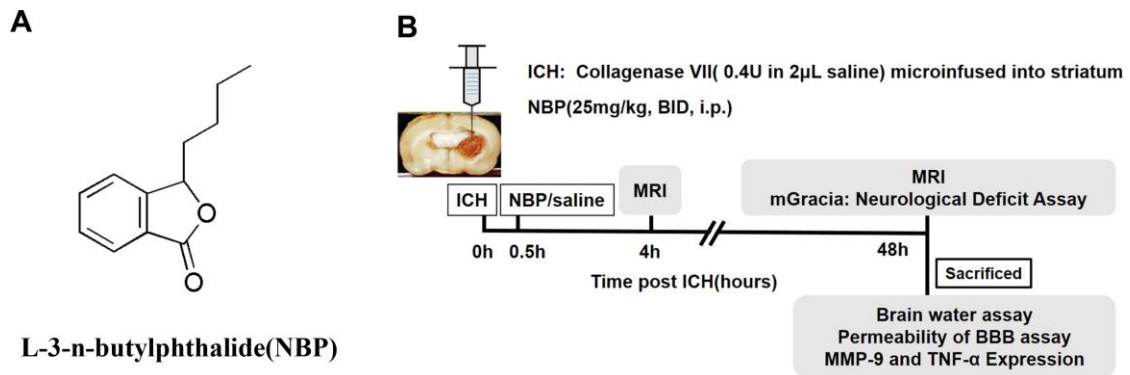

**Supplementary Figure 1. The chemical structure of NBP and the experimental design.** (A) The chemical structure of NBP; (B) The schematic diagram of experimental design. ICH: intracerebral hemorrhage; BID: twice-daily; i.p.: intraperitoneal; NBP: butylphthalide; MMP-9: matrix metalloproteinase-9; TNF- $\alpha$ : tumor necrosis factor-alpha; BBB: blood-brain barrier; MRI: magnetic resonance imaging.
